# Supplementary material for: A case-control study of rheumatoid arthritis identifies an associated single nucleotide polymorphism in the NCF4 gene, supporting a role for the NADPH-oxidase complex in autoimmunity
Source: Springer Nature journal article supplement (doi:10.1186/ar2299), 2007-09-26
Supplement: Additional file 1 [file ar2299-s1.doc]

### Supplementary table 1

1Minor allele first. 2Homozygous for the minor allele, heterozygous, homozygous for the major allele. 3Genotype frequencies from females, allele frequencies from males. *Genotyped in the complete sample set. f = failed assay. mm = monomorphic. HWD = Hardy-Weinberg disequilibrium.
